# Supplementary material
Source: publisher figshare collection journal article supplement (https://gsajournals.figshare.com/articles/dataset/_/9383543)
Supplement: Supplementary file 1 [file 1]

## Supplementary Figures

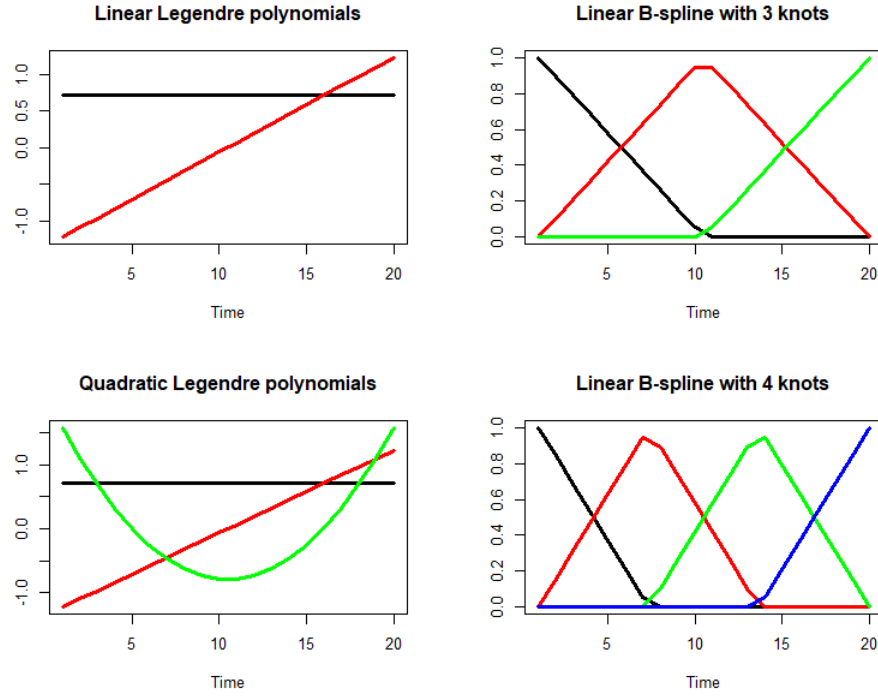

Figure S1: Linear and quadratic forms of Legendre polynomials (left) and three and four knots B-spline curves (right) over 20 days of imaging. Legendre: intercept, linear, and quadratic coefficients are represented in black, red, and green, respectively. B-spline: knot 1, knot 2, knot 3, and knot 4 are represented in black, red, green, and blue respectively.
